# Supplementary material
Source: PubMed Central journal article supplement (PMC10862384)

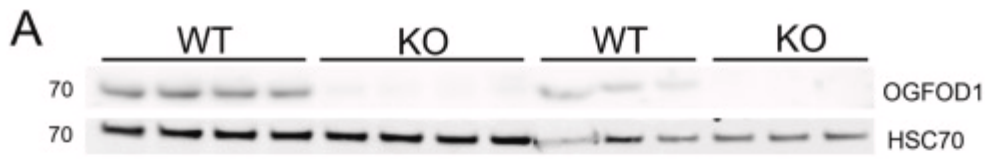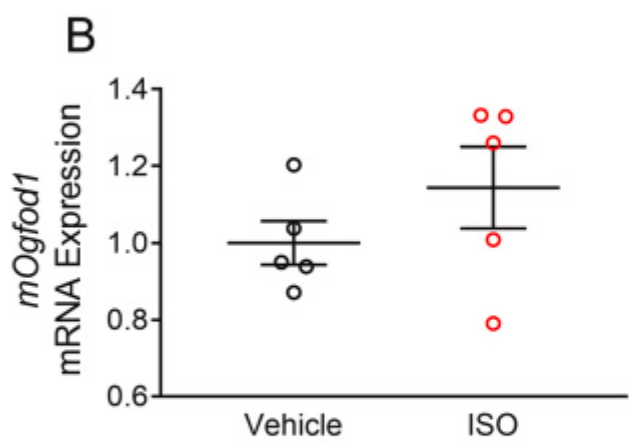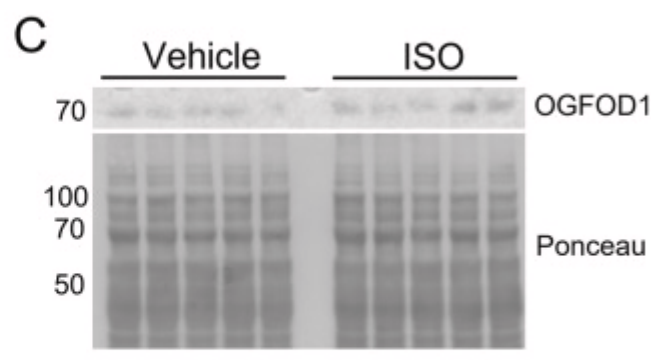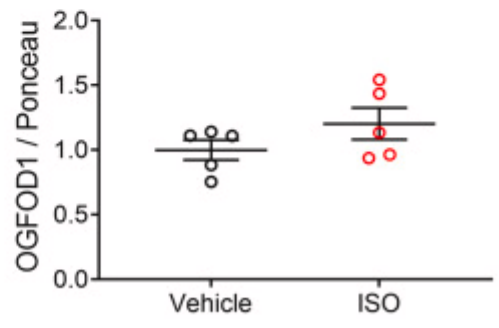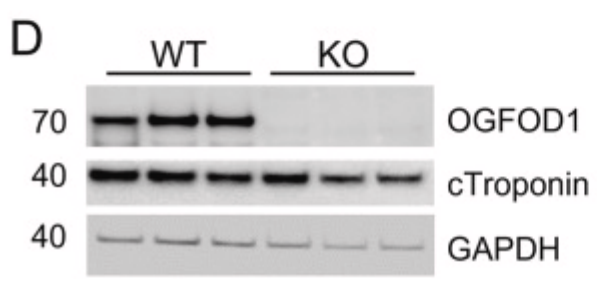

Supplement: NIHMS1958725-supplement-Supplemental_figure_3.pdf [file NIHMS1958725-supplement-Supplemental_figure_3.pdf]
